# Supplementary material for: Changing mortality trends in countries and cities of the UK: a population-based trend analysis
Source: PubMed Central journal article supplement — BMJ Open. 2020 Nov 5;10(11):e038135. doi: 10.1136/bmjopen-2020-038135 (PMC7646340; doi:10.1136/bmjopen-2020-038135), 2020-11-05

Web Figure 1. All cause deaths, all ages: percentage change in standardised mortality rates between five year periods – cities

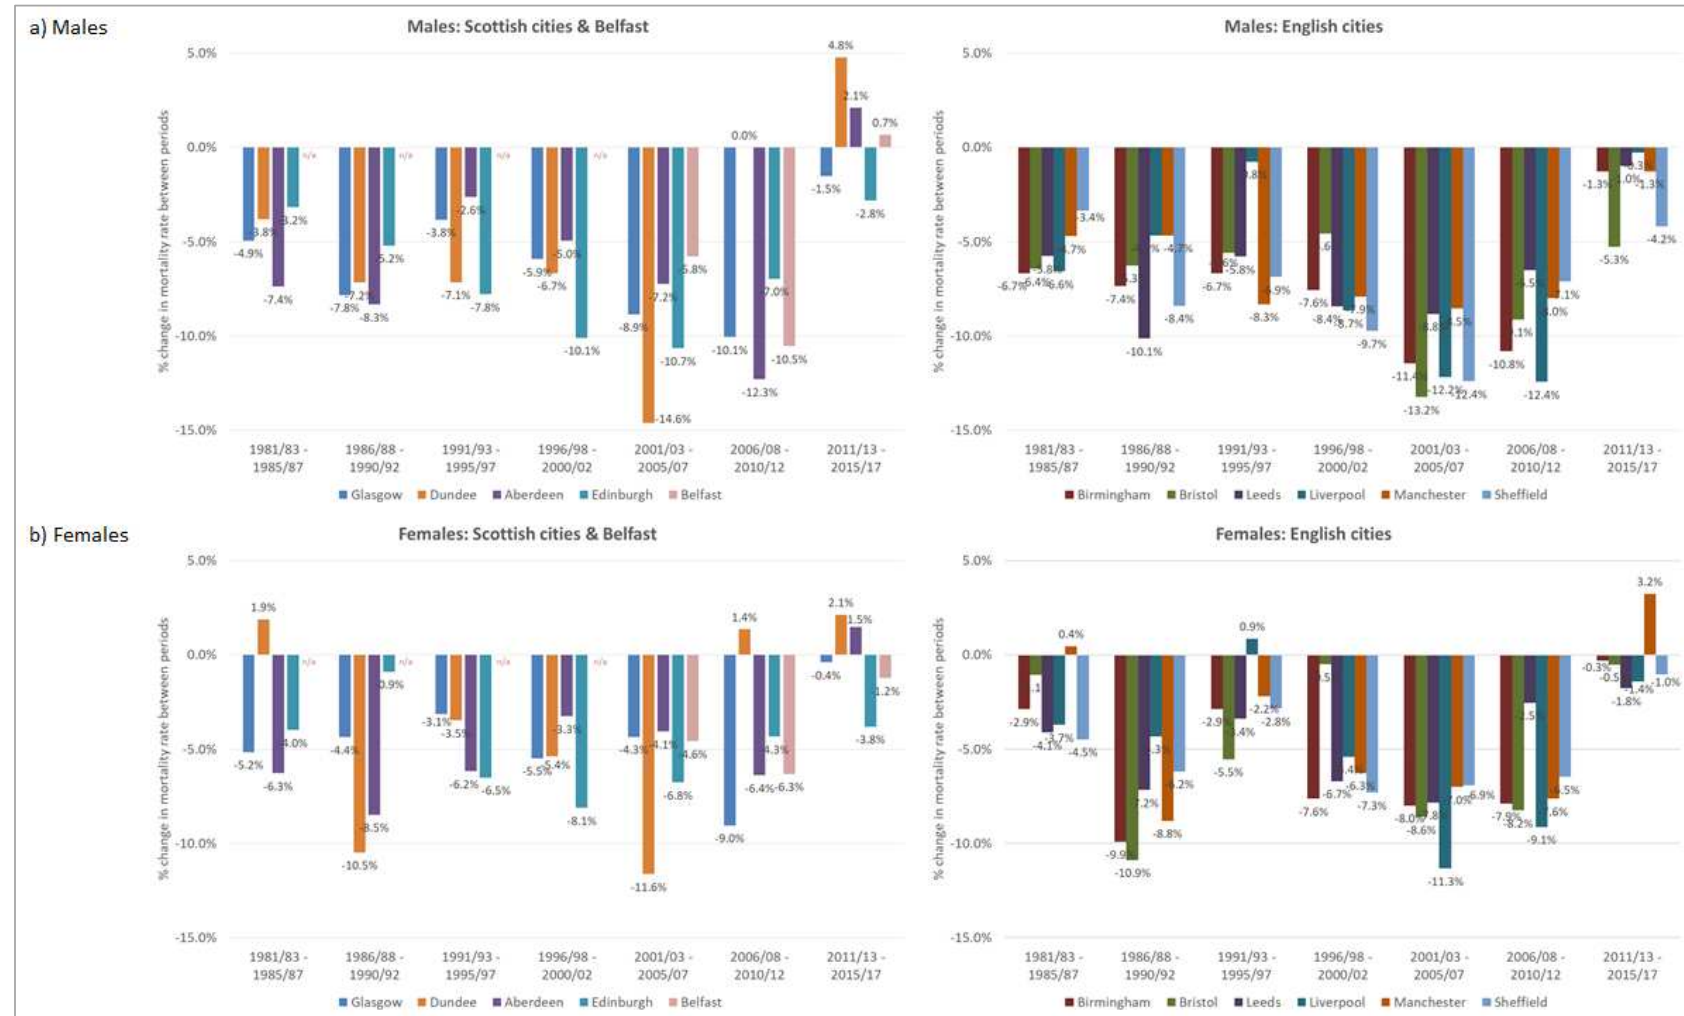

Supplement: bmjopen-2020-038135supp001.pdf [file bmjopen-2020-038135supp001.pdf]
