# Supplementary material for: Changing mortality trends in countries and cities of the UK: a population-based trend analysis
Source: PubMed Central journal article supplement — BMJ Open. 2020 Nov 5;10(11):e038135. doi: 10.1136/bmjopen-2020-038135 (PMC7646340; doi:10.1136/bmjopen-2020-038135), 2020-11-05

Web Figure 4. European age-standardised mortality rates (all causes) per 100,000 population, three-year rolling averages, by age group and UK country, 1981-2017 (note different axis scales on each chart)

Web Figure 4 (i) adult age groups

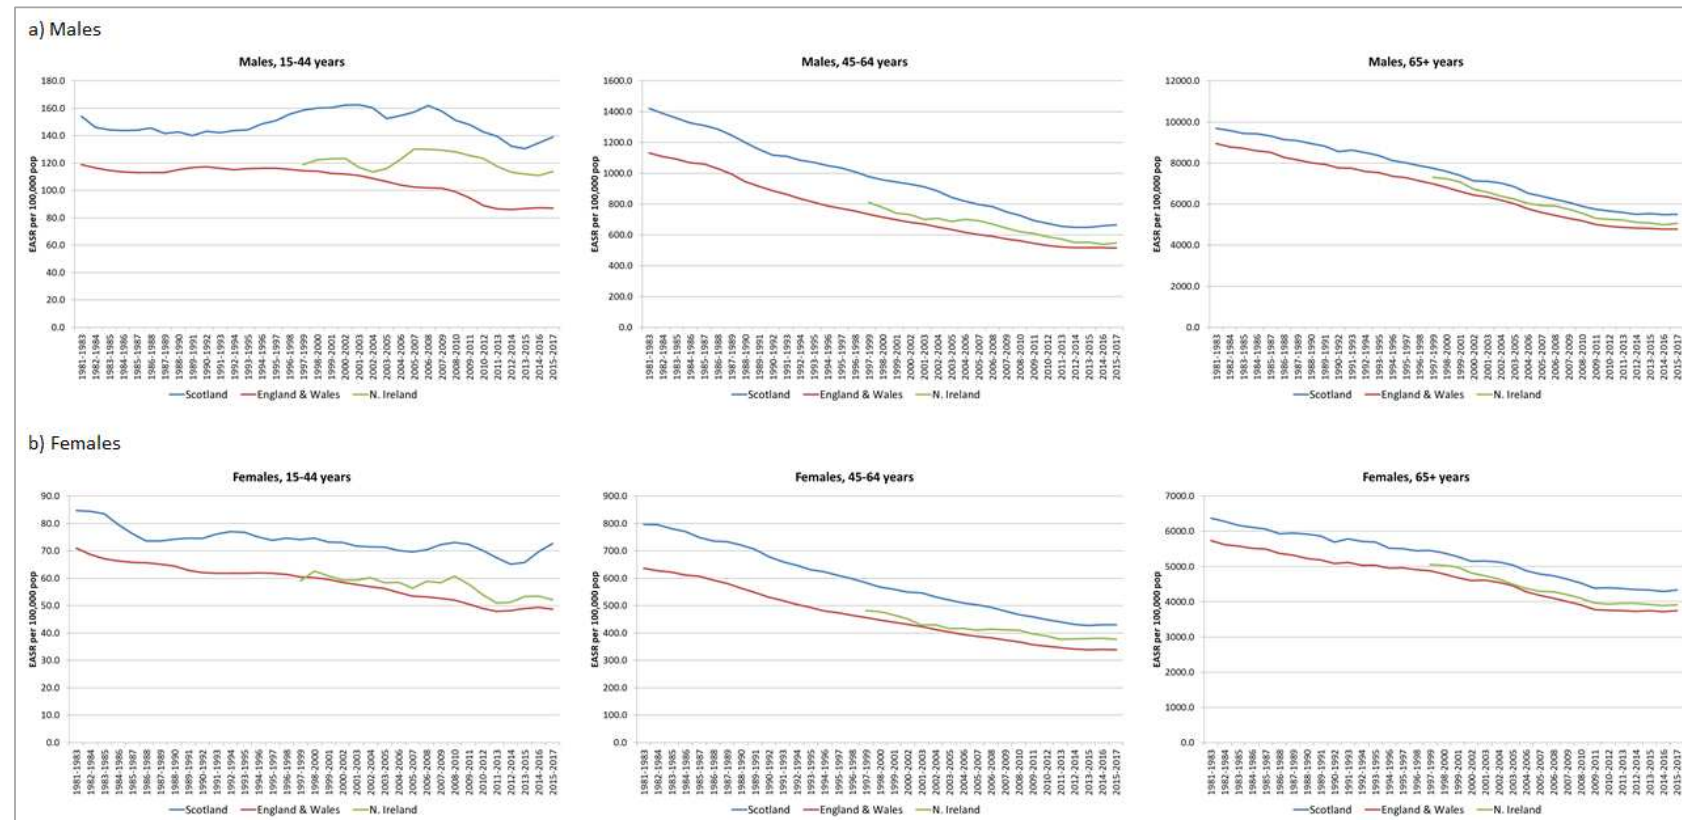

Web Figure 4 (ii) 0-14 years

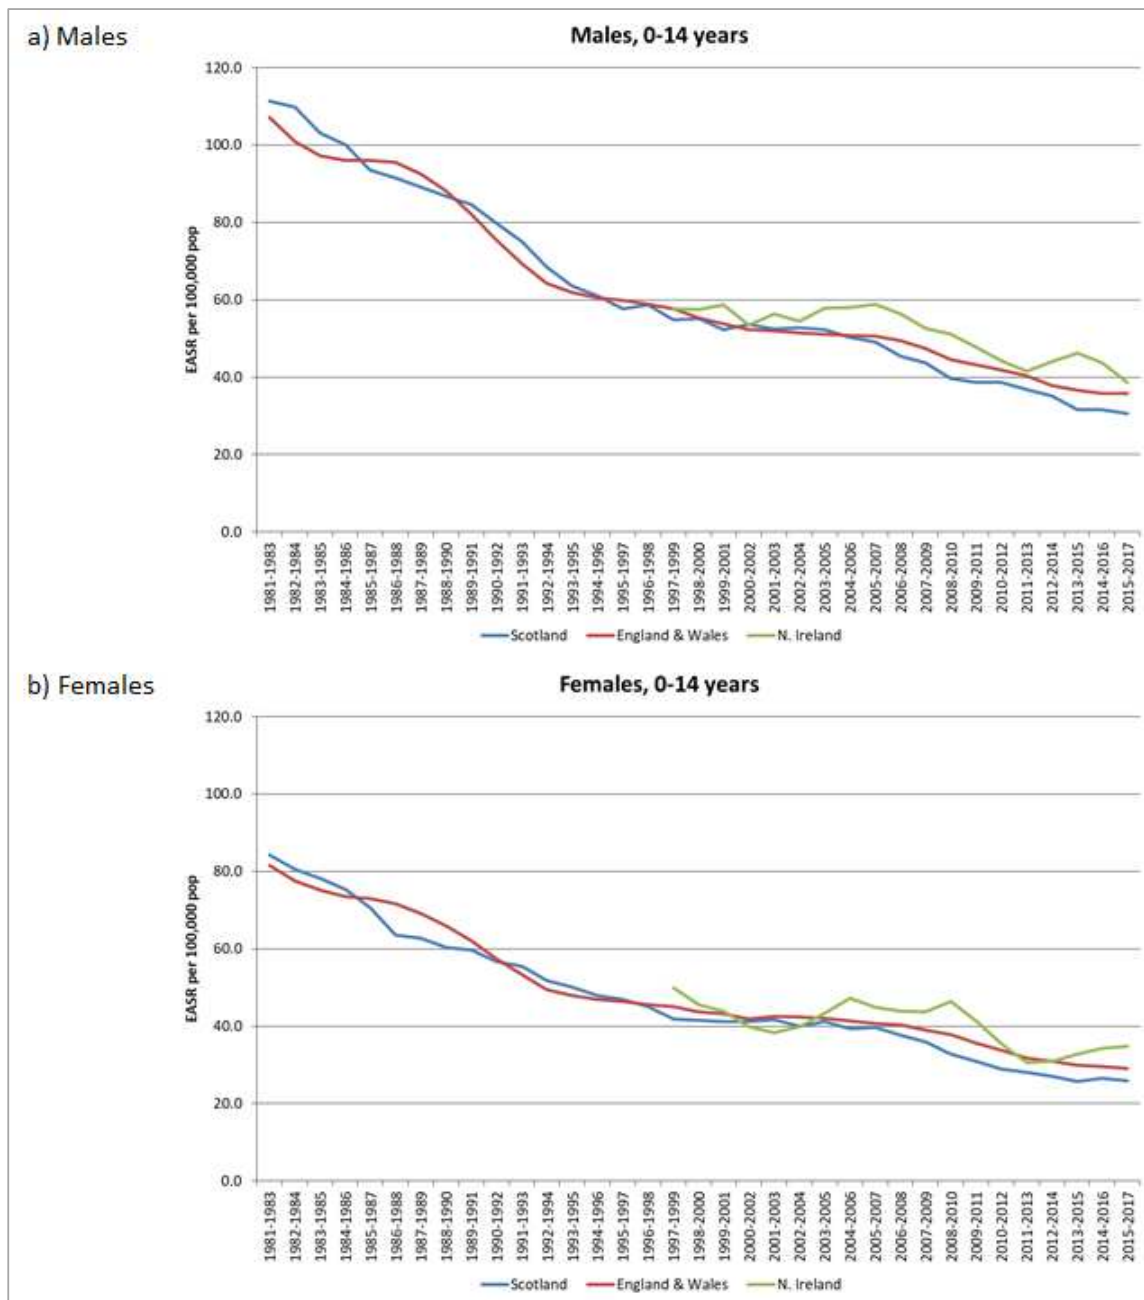

Supplement: bmjopen-2020-038135supp004.pdf [file bmjopen-2020-038135supp004.pdf]
