# Supplementary material for: Changing mortality trends in countries and cities of the UK: a population-based trend analysis
Source: PubMed Central journal article supplement — BMJ Open. 2020 Nov 5;10(11):e038135. doi: 10.1136/bmjopen-2020-038135 (PMC7646340; doi:10.1136/bmjopen-2020-038135), 2020-11-05

Web Figure 7. European age-standardised mortality rates (females, all ages) per 100,000 population, three-year rolling averages, for all-cause deaths, ischaemic heart disease, alcohol-related causes and drug-related poisonings, UK countries and cities, 1981-2017

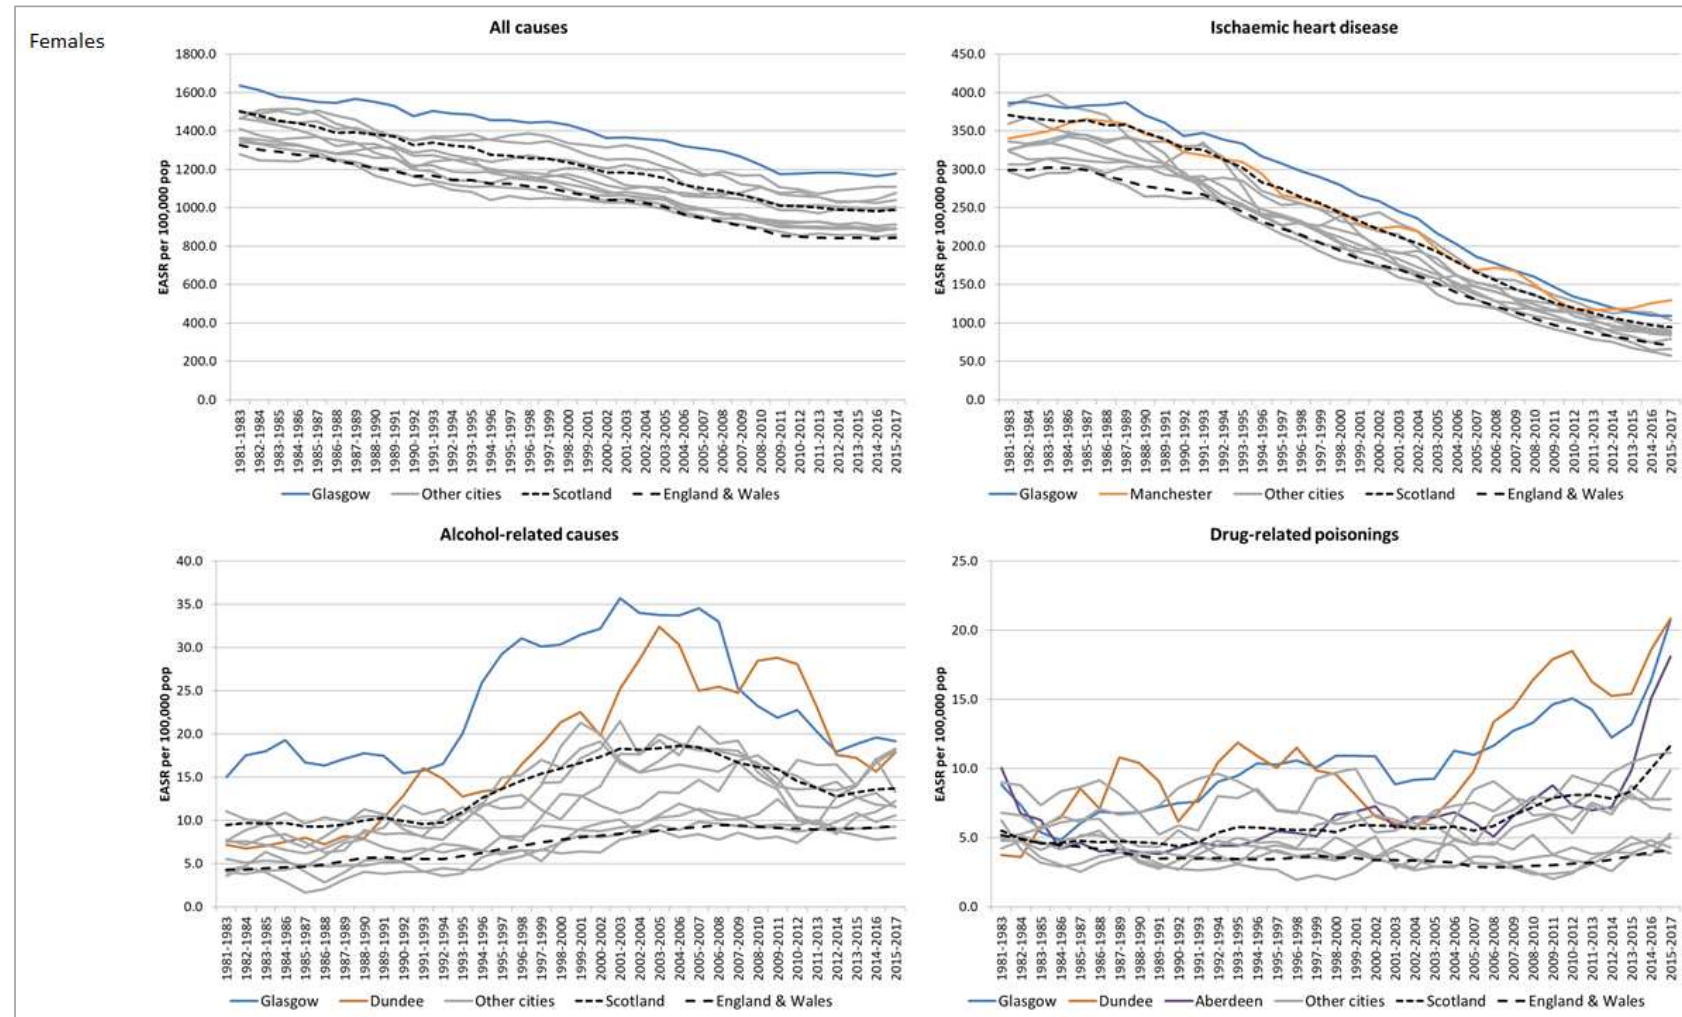

Supplement: bmjopen-2020-038135supp007.pdf [file bmjopen-2020-038135supp007.pdf]
