# Supplementary material for: Changing mortality trends in countries and cities of the UK: a population-based trend analysis
Source: PubMed Central journal article supplement — BMJ Open. 2020 Nov 5;10(11):e038135. doi: 10.1136/bmjopen-2020-038135 (PMC7646340; doi:10.1136/bmjopen-2020-038135), 2020-11-05

Web Figure 9. European age-standardised mortality rates per 100,000 population for drug-related poisonings, three-year rolling averages, Scotland and most and least by deprivation quintiles, 1981-2017

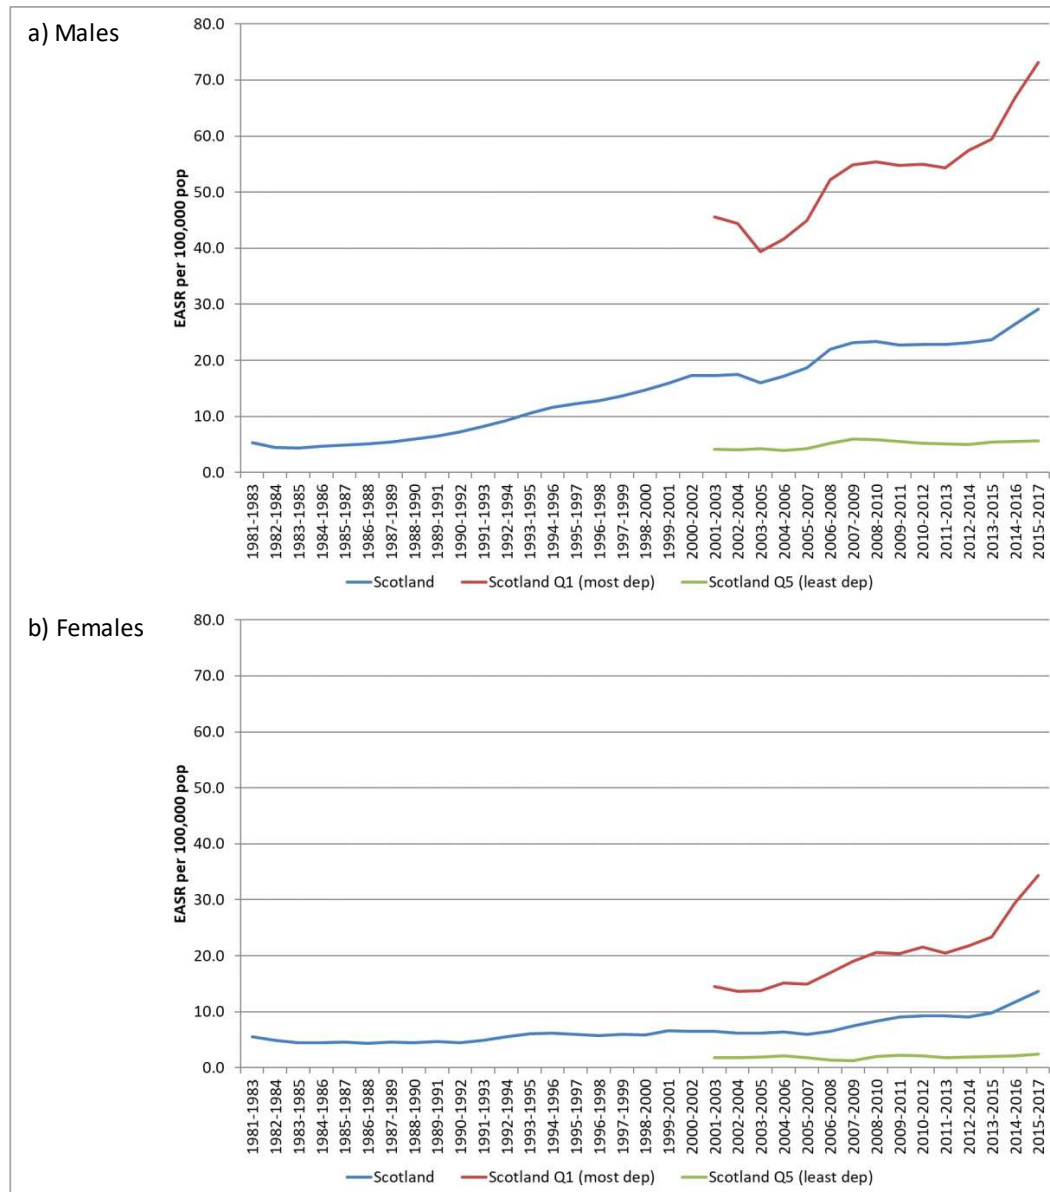

Supplement: bmjopen-2020-038135supp009.pdf [file bmjopen-2020-038135supp009.pdf]
