# Supplementary material for: Changing mortality trends in countries and cities of the UK: a population-based trend analysis
Source: PubMed Central journal article supplement — BMJ Open. 2020 Nov 5;10(11):e038135. doi: 10.1136/bmjopen-2020-038135 (PMC7646340; doi:10.1136/bmjopen-2020-038135), 2020-11-05
Supplement: bmjopen-2020-038135supp011.pdf [file bmjopen-2020-038135supp011.pdf]

Web Table 2a. Slope Index of Inequality (SII) and Relative Index of Inequality (RII) for all-cause mortality rates by deprivation quintile - males

|                  | Scotland |      | England   |      | Northern Ireland |      |          |      |
|------------------|----------|------|-----------|------|------------------|------|----------|------|
|                  | SII      | RII  | SII       | RII  | SII              | RII  |          |      |
| <b>2001-2003</b> | 1168.8   | 0.69 | 823.3     | 0.56 | 620.7            | 0.41 |          |      |
| <b>2002-2004</b> | 1166.5   | 0.70 | 821.8     | 0.58 | 536.0            | 0.36 |          |      |
| <b>2003-2005</b> | 1118.8   | 0.69 | 811.7     | 0.59 | 562.0            | 0.39 |          |      |
| <b>2004-2006</b> | 1102.6   | 0.71 | 796.5     | 0.60 | 593.3            | 0.42 |          |      |
| <b>2005-2007</b> | 1133.7   | 0.74 | 792.7     | 0.61 | 639.2            | 0.46 |          |      |
| <b>2006-2008</b> | 1129.6   | 0.76 | 797.3     | 0.63 | 653.7            | 0.47 |          |      |
| <b>2007-2009</b> | 1106.7   | 0.76 | 795.0     | 0.65 | 629.1            | 0.47 |          |      |
| <b>2008-2010</b> | 1044.7   | 0.74 | 776.0     | 0.65 | 615.4            | 0.47 |          |      |
| <b>2009-2011</b> | 1030.8   | 0.75 | 755.6     | 0.65 | 569.9            | 0.45 |          |      |
| <b>2010-2012</b> | 1018.7   | 0.76 | 738.8     | 0.65 | 586.9            | 0.48 |          |      |
| <b>2011-2013</b> | 1019.2   | 0.77 | 743.0     | 0.66 | 615.6            | 0.50 |          |      |
| <b>2012-2014</b> | 1012.4   | 0.78 | 745.6     | 0.67 | 609.3            | 0.51 |          |      |
| <b>2013-2015</b> | 1022.8   | 0.78 | 766.9     | 0.69 | 606.7            | 0.51 |          |      |
| <b>2014-2016</b> | 1050.7   | 0.81 | 778.2     | 0.71 | 616.5            | 0.53 |          |      |
| <b>2015-2017</b> | 1078.2   | 0.83 | 784.6     | 0.71 | 656.0            | 0.55 |          |      |
|                  |          |      |           |      |                  |      |          |      |
|                  | Glasgow  |      | Edinburgh |      | Dundee           |      | Aberdeen |      |
|                  | SII      | RII  | SII       | RII  | SII              | RII  | SII      | RII  |
| <b>2001-2003</b> | 1373.7   | 0.64 | 1365.7    | 0.87 | 1023.4           | 0.57 | 942.5    | 0.58 |
| <b>2002-2004</b> | 1383.3   | 0.64 | 1292.4    | 0.84 | 993.9            | 0.56 | 983.6    | 0.62 |
| <b>2003-2005</b> | 1270.9   | 0.61 | 1198.3    | 0.79 | 877.8            | 0.51 | 999.4    | 0.66 |
| <b>2004-2006</b> | 1294.3   | 0.65 | 1229.5    | 0.84 | 778.1            | 0.49 | 1061.9   | 0.70 |
| <b>2005-2007</b> | 1279.0   | 0.65 | 1314.4    | 0.93 | 943.0            | 0.62 | 1076.5   | 0.71 |
| <b>2006-2008</b> | 1299.4   | 0.67 | 1265.2    | 0.93 | 1041.7           | 0.70 | 1207.9   | 0.82 |
| <b>2007-2009</b> | 1239.5   | 0.65 | 1193.2    | 0.90 | 1044.4           | 0.68 | 1200.6   | 0.83 |
| <b>2008-2010</b> | 1138.2   | 0.62 | 1068.5    | 0.81 | 912.2            | 0.61 | 1161.8   | 0.85 |
| <b>2009-2011</b> | 1187.1   | 0.67 | 1127.3    | 0.87 | 848.4            | 0.56 | 1061.8   | 0.80 |
| <b>2010-2012</b> | 1238.5   | 0.71 | 1045.7    | 0.82 | 986.1            | 0.66 | 905.0    | 0.70 |
| <b>2011-2013</b> | 1300.2   | 0.75 | 1081.5    | 0.87 | 1061.9           | 0.74 | 865.9    | 0.66 |
| <b>2012-2014</b> | 1266.5   | 0.75 | 1120.2    | 0.92 | 1235.2           | 0.88 | 844.7    | 0.64 |
| <b>2013-2015</b> | 1248.0   | 0.74 | 1187.1    | 0.97 | 1249.0           | 0.88 | 936.0    | 0.69 |
| <b>2014-2016</b> | 1278.6   | 0.76 | 1211.4    | 1.00 | 1422.1           | 0.97 | 1001.7   | 0.74 |
| <b>2015-2017</b> | 1329.8   | 0.78 | 1178.6    | 0.97 | 1443.5           | 0.96 | 1108.3   | 0.83 |

Web Table 2b. Slope Index of Inequality (SII) and Relative Index of Inequality (RII) for all-cause mortality rates by deprivation quintile - females

|                  | Scotland |      | England   |      | Northern Ireland |      |          |      |
|------------------|----------|------|-----------|------|------------------|------|----------|------|
|                  | SII      | RII  | SII       | RII  | SII              | RII  |          |      |
| <b>2001-2003</b> | 568.3    | 0.48 | 453.0     | 0.44 | 226.3            | 0.21 |          |      |
| <b>2002-2004</b> | 580.2    | 0.49 | 465.9     | 0.46 | 247.1            | 0.24 |          |      |
| <b>2003-2005</b> | 581.9    | 0.50 | 473.7     | 0.47 | 289.7            | 0.29 |          |      |
| <b>2004-2006</b> | 587.7    | 0.53 | 461.6     | 0.48 | 337.1            | 0.34 |          |      |
| <b>2005-2007</b> | 585.8    | 0.53 | 455.5     | 0.48 | 329.6            | 0.34 |          |      |
| <b>2006-2008</b> | 603.7    | 0.56 | 457.8     | 0.50 | 333.4            | 0.34 |          |      |
| <b>2007-2009</b> | 616.0    | 0.58 | 461.2     | 0.51 | 341.8            | 0.36 |          |      |
| <b>2008-2010</b> | 617.8    | 0.59 | 459.3     | 0.52 | 339.4            | 0.36 |          |      |
| <b>2009-2011</b> | 599.1    | 0.59 | 453.9     | 0.53 | 329.2            | 0.36 |          |      |
| <b>2010-2012</b> | 607.3    | 0.60 | 454.5     | 0.54 | 323.0            | 0.36 |          |      |
| <b>2011-2013</b> | 607.4    | 0.61 | 469.5     | 0.56 | 331.6            | 0.37 |          |      |
| <b>2012-2014</b> | 628.6    | 0.63 | 478.3     | 0.57 | 342.5            | 0.38 |          |      |
| <b>2013-2015</b> | 643.4    | 0.65 | 502.3     | 0.60 | 368.3            | 0.41 |          |      |
| <b>2014-2016</b> | 662.5    | 0.67 | 512.9     | 0.61 | 374.3            | 0.42 |          |      |
| <b>2015-2017</b> | 685.7    | 0.69 | 528.6     | 0.63 | 367.6            | 0.41 |          |      |
|                  |          |      |           |      |                  |      |          |      |
|                  | Glasgow  |      | Edinburgh |      | Dundee           |      | Aberdeen |      |
|                  | SII      | RII  | SII       | RII  | SII              | RII  | SII      | RII  |
| <b>2001-2003</b> | 562.8    | 0.41 | 579.4     | 0.54 | 445.9            | 0.36 | 493.1    | 0.45 |
| <b>2002-2004</b> | 676.4    | 0.50 | 606.3     | 0.57 | 534.1            | 0.45 | 543.6    | 0.49 |
| <b>2003-2005</b> | 620.7    | 0.46 | 575.0     | 0.55 | 570.7            | 0.48 | 445.1    | 0.40 |
| <b>2004-2006</b> | 683.0    | 0.52 | 538.4     | 0.53 | 612.9            | 0.54 | 481.0    | 0.45 |
| <b>2005-2007</b> | 656.8    | 0.50 | 515.7     | 0.52 | 605.7            | 0.56 | 498.0    | 0.47 |
| <b>2006-2008</b> | 678.3    | 0.52 | 589.1     | 0.61 | 585.4            | 0.55 | 576.5    | 0.55 |
| <b>2007-2009</b> | 694.3    | 0.55 | 639.7     | 0.66 | 556.6            | 0.51 | 526.2    | 0.50 |
| <b>2008-2010</b> | 709.5    | 0.58 | 676.2     | 0.72 | 493.5            | 0.45 | 520.1    | 0.51 |
| <b>2009-2011</b> | 757.4    | 0.64 | 676.8     | 0.73 | 536.6            | 0.50 | 483.6    | 0.49 |
| <b>2010-2012</b> | 781.4    | 0.66 | 698.6     | 0.75 | 643.8            | 0.60 | 394.3    | 0.40 |
| <b>2011-2013</b> | 795.7    | 0.67 | 692.6     | 0.75 | 624.7            | 0.59 | 442.3    | 0.46 |
| <b>2012-2014</b> | 744.4    | 0.63 | 665.3     | 0.73 | 605.3            | 0.59 | 512.1    | 0.52 |
| <b>2013-2015</b> | 740.9    | 0.63 | 704.1     | 0.78 | 498.5            | 0.48 | 665.4    | 0.67 |
| <b>2014-2016</b> | 794.7    | 0.68 | 726.0     | 0.81 | 684.7            | 0.66 | 637.8    | 0.64 |
| <b>2015-2017</b> | 887.7    | 0.75 | 767.0     | 0.86 | 783.1            | 0.73 | 597.3    | 0.61 |
