# Supplementary material for: Changing mortality trends in countries and cities of the UK: a population-based trend analysis
Source: PubMed Central journal article supplement — BMJ Open. 2020 Nov 5;10(11):e038135. doi: 10.1136/bmjopen-2020-038135 (PMC7646340; doi:10.1136/bmjopen-2020-038135), 2020-11-05
Supplement: bmjopen-2020-038135supp012.pdf [file bmjopen-2020-038135supp012.pdf]

Web Table 3a. Slope Index of Inequality (SII) and Relative Index of Inequality (RII) for mortality rates by deprivation quintile: 10 major causes of death, Scotland, males

|           | Respiratory disease |      | Ischaemic heart disease |      | Cerebrovascular disease |      | All malignant neoplasms      |      | Lung cancer                     |       |
|-----------|---------------------|------|-------------------------|------|-------------------------|------|------------------------------|------|---------------------------------|-------|
|           | SII                 | RII  | SII                     | RII  | SII                     | RII  | SII                          | RII  | SII                             | RII   |
| 2001-2003 | 197.1               | 0.90 | 283.8                   | 0.74 | 62.7                    | 0.37 | 269.4                        | 0.59 | 152.3                           | 1.18  |
| 2002-2004 | 202.0               | 0.93 | 267.4                   | 0.72 | 60.1                    | 0.36 | 269.7                        | 0.60 | 146.6                           | 1.18  |
| 2003-2005 | 197.2               | 0.91 | 256.1                   | 0.73 | 61.6                    | 0.39 | 262.1                        | 0.60 | 147.4                           | 1.22  |
| 2004-2006 | 183.9               | 0.90 | 225.0                   | 0.69 | 52.2                    | 0.36 | 276.9                        | 0.64 | 152.3                           | 1.29  |
| 2005-2007 | 185.4               | 0.90 | 233.0                   | 0.76 | 50.0                    | 0.37 | 289.5                        | 0.68 | 158.0                           | 1.33  |
| 2006-2008 | 189.1               | 0.93 | 215.6                   | 0.76 | 53.0                    | 0.41 | 280.1                        | 0.67 | 155.7                           | 1.35  |
| 2007-2009 | 196.8               | 0.98 | 211.3                   | 0.78 | 55.2                    | 0.45 | 268.9                        | 0.65 | 154.6                           | 1.36  |
| 2008-2010 | 189.4               | 0.99 | 190.2                   | 0.75 | 50.9                    | 0.44 | 254.0                        | 0.63 | 146.6                           | 1.34  |
| 2009-2011 | 185.0               | 1.01 | 182.7                   | 0.77 | 45.7                    | 0.43 | 268.0                        | 0.67 | 144.3                           | 1.33  |
| 2010-2012 | 177.8               | 1.00 | 187.1                   | 0.83 | 39.9                    | 0.40 | 270.8                        | 0.68 | 140.1                           | 1.33  |
| 2011-2013 | 184.0               | 1.05 | 180.3                   | 0.85 | 41.3                    | 0.43 | 269.7                        | 0.68 | 143.2                           | 1.39  |
| 2012-2014 | 174.4               | 1.02 | 182.7                   | 0.90 | 34.7                    | 0.38 | 262.5                        | 0.68 | 140.8                           | 1.41  |
| 2013-2015 | 179.8               | 1.05 | 174.6                   | 0.89 | 39.0                    | 0.44 | 253.6                        | 0.66 | 136.3                           | 1.40  |
| 2014-2016 | 178.9               | 1.06 | 169.4                   | 0.90 | 42.0                    | 0.49 | 255.9                        | 0.67 | 127.8                           | 1.35  |
| 2015-2017 | 185.3               | 1.12 | 165.6                   | 0.89 | 45.1                    | 0.54 | 254.3                        | 0.67 | 126.4                           | 1.38  |
|           | External causes     |      | Drug related poisonings |      | Alcohol-related causes  |      | Suicide (incl. undetermined) |      | Motor vehicle traffic accidents |       |
|           | SII                 | RII  | SII                     | RII  | SII                     | RII  | SII                          | RII  | SII                             | RII   |
| 2001-2003 | 77.6                | 1.16 | 37.5                    | 2.58 | 106.5                   | 2.33 | 35.7                         | 1.4  | 1.0                             | 0.10  |
| 2002-2004 | 79.3                | 1.17 | 36.6                    | 2.47 | 110.8                   | 2.40 | 34.3                         | 1.4  | -0.6                            | -0.07 |
| 2003-2005 | 72.7                | 1.10 | 32.1                    | 2.36 | 106.3                   | 2.33 | 29.4                         | 1.3  | -1.0                            | -0.11 |
| 2004-2006 | 72.9                | 1.11 | 36.0                    | 2.49 | 106.9                   | 2.40 | 30.1                         | 1.3  | 1.5                             | 0.16  |
| 2005-2007 | 69.7                | 1.11 | 39.4                    | 2.50 | 102.7                   | 2.40 | 29.8                         | 1.3  | 2.4                             | 0.29  |
| 2006-2008 | 69.4                | 1.11 | 47.0                    | 2.53 | 102.0                   | 2.46 | 31.8                         | 1.3  | 3.1                             | 0.38  |
| 2007-2009 | 67.1                | 1.11 | 48.3                    | 2.49 | 91.5                    | 2.40 | 31.9                         | 1.4  | 1.8                             | 0.25  |
| 2008-2010 | 64.8                | 1.11 | 48.4                    | 2.48 | 87.3                    | 2.35 | 31.6                         | 1.4  | 1.3                             | 0.20  |
| 2009-2011 | 72.9                | 1.17 | 46.3                    | 2.43 | 76.5                    | 2.20 | 32.8                         | 1.5  | 2.1                             | 0.36  |
| 2010-2012 | 80.0                | 1.21 | 47.1                    | 2.46 | 72.6                    | 2.18 | 31.3                         | 1.3  | 1.5                             | 0.28  |
| 2011-2013 | 89.7                | 1.28 | 47.5                    | 2.47 | 65.0                    | 2.11 | 30.4                         | 1.3  | 2.7                             | 0.51  |
| 2012-2014 | 89.8                | 1.32 | 49.7                    | 2.56 | 66.4                    | 2.20 | 25.9                         | 1.2  | 2.0                             | 0.38  |
| 2013-2015 | 89.5                | 1.33 | 51.4                    | 2.59 | 64.3                    | 2.13 | 22.9                         | 1.1  | 2.7                             | 0.53  |
| 2014-2016 | 101.0               | 1.43 | 58.7                    | 2.66 | 67.4                    | 2.14 | 22.7                         | 1.2  | 2.9                             | 0.57  |
| 2015-2017 | 112.4               | 1.50 | 65.9                    | 2.71 | 67.0                    | 2.08 | 23.5                         | 1.2  | 2.9                             | 0.65  |

Web Table 3b. Slope Index of Inequality (SII) and Relative Index of Inequality (RII) for mortality rates by deprivation quintile: 10 major causes of death, Scotland, females

|           | Respiratory disease |      | Ischaemic heart disease |      | Cerebrovascular disease |      | All malignant neoplasms      |      | Lung cancer                     |       |
|-----------|---------------------|------|-------------------------|------|-------------------------|------|------------------------------|------|---------------------------------|-------|
|           | SII                 | RII  | SII                     | RII  | SII                     | RII  | SII                          | RII  | SII                             | RII   |
| 2001-2003 | 110.5               | 0.75 | 135.7                   | 0.64 | 24.3                    | 0.15 | 154.0                        | 0.52 | 84.3                            | 1.24  |
| 2002-2004 | 116.7               | 0.78 | 125.1                   | 0.61 | 24.8                    | 0.16 | 160.7                        | 0.55 | 87.5                            | 1.26  |
| 2003-2005 | 121.1               | 0.80 | 119.8                   | 0.62 | 22.6                    | 0.15 | 157.1                        | 0.54 | 86.5                            | 1.23  |
| 2004-2006 | 124.3               | 0.83 | 111.9                   | 0.62 | 19.5                    | 0.14 | 155.5                        | 0.54 | 88.7                            | 1.23  |
| 2005-2007 | 127.1               | 0.84 | 109.4                   | 0.66 | 10.2                    | 0.08 | 155.4                        | 0.54 | 93.3                            | 1.28  |
| 2006-2008 | 133.5               | 0.88 | 103.8                   | 0.67 | 17.6                    | 0.14 | 158.2                        | 0.55 | 96.2                            | 1.29  |
| 2007-2009 | 136.3               | 0.92 | 102.6                   | 0.71 | 18.5                    | 0.16 | 169.6                        | 0.60 | 99.7                            | 1.34  |
| 2008-2010 | 137.8               | 0.96 | 96.2                    | 0.71 | 24.5                    | 0.22 | 174.3                        | 0.62 | 98.4                            | 1.32  |
| 2009-2011 | 137.4               | 1.01 | 87.4                    | 0.69 | 22.2                    | 0.21 | 175.6                        | 0.63 | 99.7                            | 1.35  |
| 2010-2012 | 147.2               | 1.09 | 80.9                    | 0.67 | 22.7                    | 0.23 | 173.9                        | 0.62 | 104.2                           | 1.40  |
| 2011-2013 | 146.3               | 1.10 | 76.1                    | 0.67 | 20.3                    | 0.21 | 174.7                        | 0.63 | 107.5                           | 1.45  |
| 2012-2014 | 143.6               | 1.10 | 83.9                    | 0.79 | 19.5                    | 0.21 | 183.7                        | 0.66 | 109.6                           | 1.49  |
| 2013-2015 | 139.5               | 1.06 | 84.9                    | 0.83 | 23.9                    | 0.27 | 186.3                        | 0.68 | 106.7                           | 1.49  |
| 2014-2016 | 146.9               | 1.12 | 87.4                    | 0.90 | 24.0                    | 0.29 | 184.8                        | 0.69 | 105.6                           | 1.51  |
| 2015-2017 | 150.8               | 1.14 | 80.7                    | 0.86 | 25.5                    | 0.32 | 180.6                        | 0.68 | 106.7                           | 1.53  |
|           | External causes     |      | Drug related poisonings |      | Alcohol-related causes  |      | Suicide (incl. undetermined) |      | Motor vehicle traffic accidents |       |
|           | SII                 | RII  | SII                     | RII  | SII                     | RII  | SII                          | RII  | SII                             | RII   |
| 2001-2003 | 17.0                | 0.50 | 13.2                    | 2.26 | 35.9                    | 1.96 | 12.5                         | 1.47 | 0.1                             | 0.04  |
| 2002-2004 | 18.1                | 0.53 | 12.7                    | 2.25 | 35.2                    | 1.94 | 11.5                         | 1.39 | 0.2                             | 0.06  |
| 2003-2005 | 18.7                | 0.56 | 12.0                    | 2.10 | 35.0                    | 1.91 | 10.9                         | 1.34 | 0.1                             | 0.02  |
| 2004-2006 | 21.7                | 0.68 | 12.6                    | 2.17 | 35.4                    | 1.90 | 10.1                         | 1.34 | 0.5                             | 0.19  |
| 2005-2007 | 23.5                | 0.76 | 12.6                    | 2.28 | 35.6                    | 1.93 | 11.6                         | 1.57 | 0.7                             | 0.27  |
| 2006-2008 | 25.2                | 0.84 | 14.6                    | 2.50 | 34.5                    | 1.95 | 12.1                         | 1.64 | 0.4                             | 0.14  |
| 2007-2009 | 22.7                | 0.74 | 16.8                    | 2.55 | 30.6                    | 1.84 | 11.3                         | 1.48 | 0.1                             | 0.04  |
| 2008-2010 | 21.1                | 0.70 | 17.9                    | 2.49 | 29.0                    | 1.80 | 9.6                          | 1.30 | -0.4                            | -0.17 |
| 2009-2011 | 23.4                | 0.74 | 18.7                    | 2.39 | 26.5                    | 1.66 | 9.7                          | 1.25 | 0.0                             | 0.02  |
| 2010-2012 | 29.6                | 0.92 | 19.5                    | 2.41 | 25.7                    | 1.77 | 10.5                         | 1.31 | -0.5                            | -0.26 |
| 2011-2013 | 32.9                | 1.01 | 19.0                    | 2.35 | 23.1                    | 1.68 | 10.0                         | 1.27 | -0.8                            | -0.49 |
| 2012-2014 | 31.8                | 0.99 | 19.3                    | 2.47 | 21.8                    | 1.70 | 9.2                          | 1.28 | -0.8                            | -0.48 |
| 2013-2015 | 32.7                | 0.97 | 21.1                    | 2.52 | 23.0                    | 1.74 | 7.8                          | 1.12 | -0.2                            | -0.10 |
| 2014-2016 | 37.6                | 1.03 | 27.1                    | 2.71 | 24.2                    | 1.78 | 7.5                          | 1.04 | 0.3                             | 0.20  |
| 2015-2017 | 46.1                | 1.18 | 31.3                    | 2.69 | 24.3                    | 1.77 | 6.6                          | 0.98 | 0.6                             | 0.33  |
